# Supplementary material for: Synthesis and Assessment of Novel Sustainable Antioxidants with Different Polymer Systems
Source: MDPI journal article supplement (doi:10.3390/polym16030413), 2024-02-01
Supplement: s1 [file s1]

## SUPPORTING INFORMATION

### Synthesis and assessment of novel sustainable antioxidants with different polymer systems.

Agathe Mouren, Eric Pollet, Luc Avérous\*

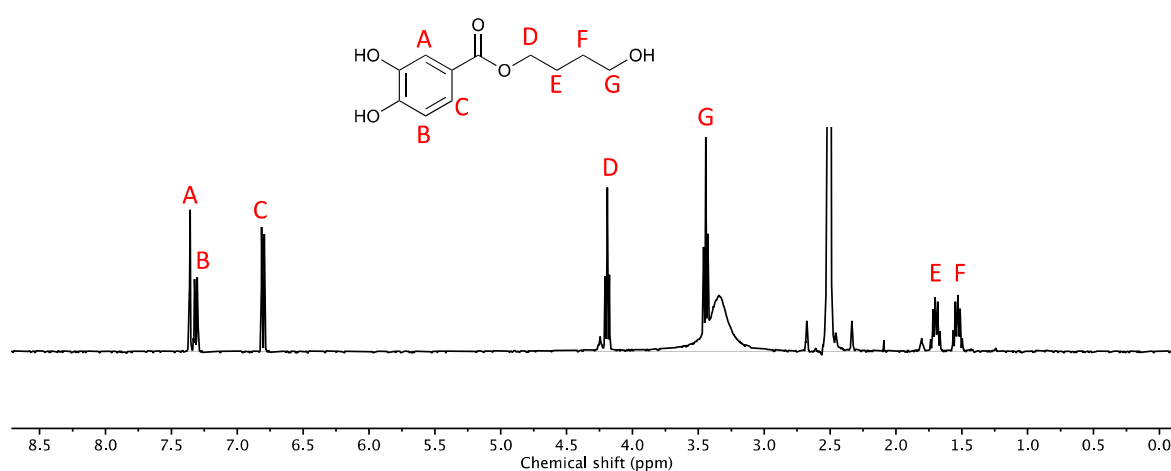

Figure S1. <sup>1</sup>H NMR spectrum of BDO-3,4DHB in DMSO-d<sub>6</sub>.

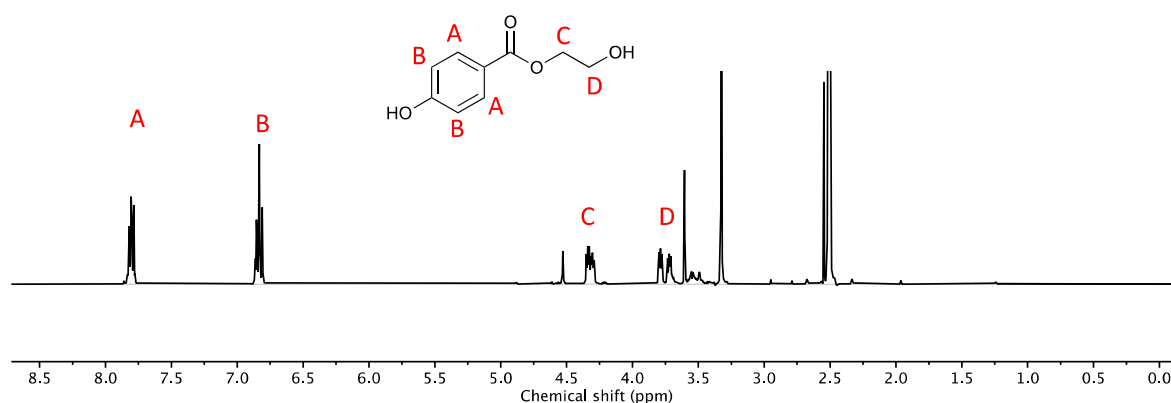

Figure S2. <sup>1</sup>H NMR spectrum of EG-4HB in DMSO-d<sub>6</sub>.

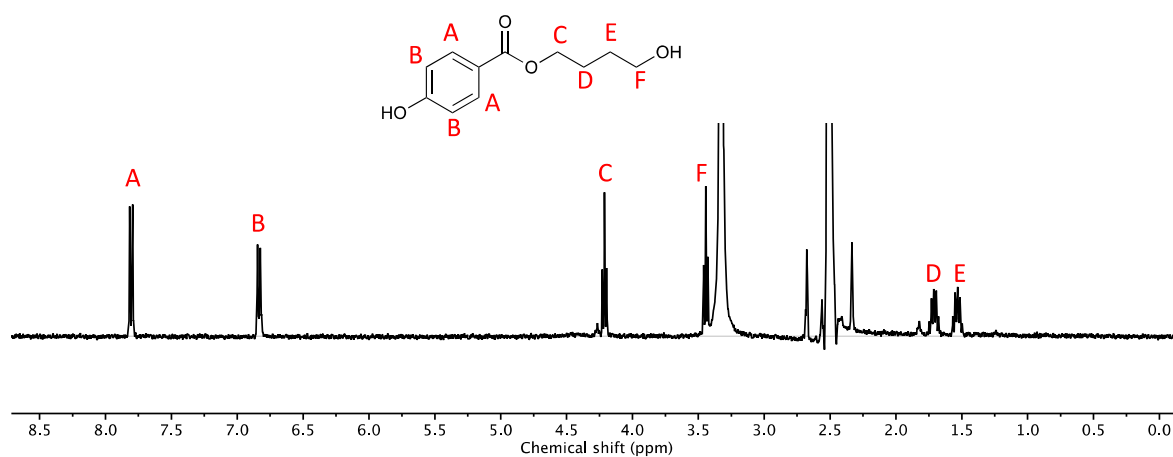

**Figure S3.**  $^1\text{H}$  NMR spectrum of BDO-4HB in  $\text{DMSO}-d_6$ .

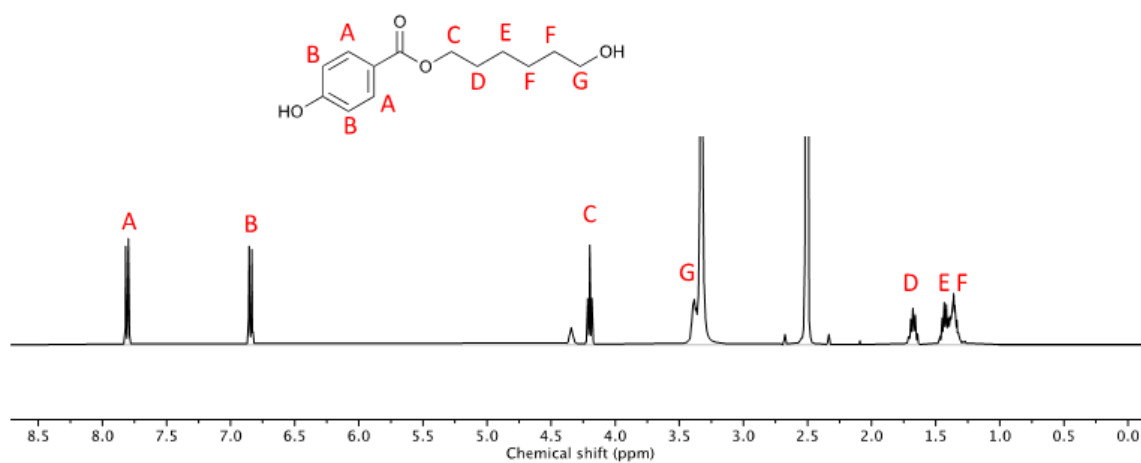

**Figure S4.**  $^1\text{H}$  NMR spectrum of HDO-4HB in  $\text{DMSO}-d_6$ .

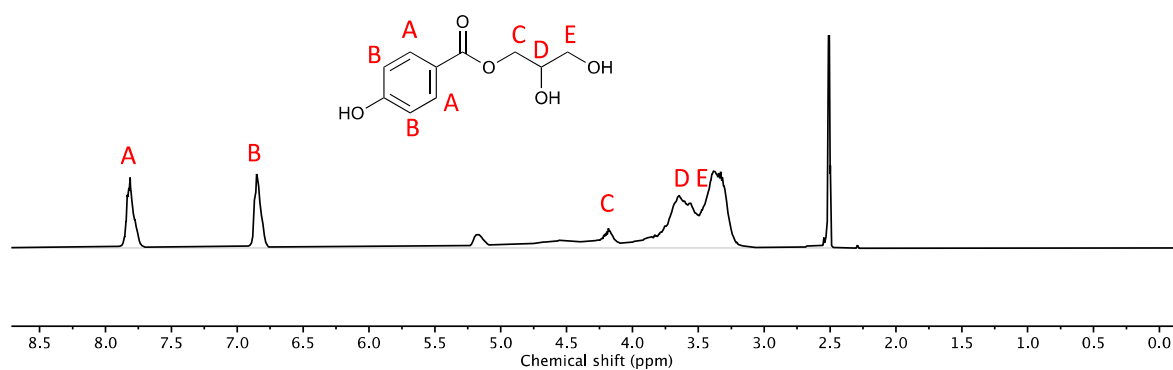

**Figure S5.**  $^1\text{H}$  NMR spectrum of glycerol-4HB in  $\text{DMSO}-d_6$ .

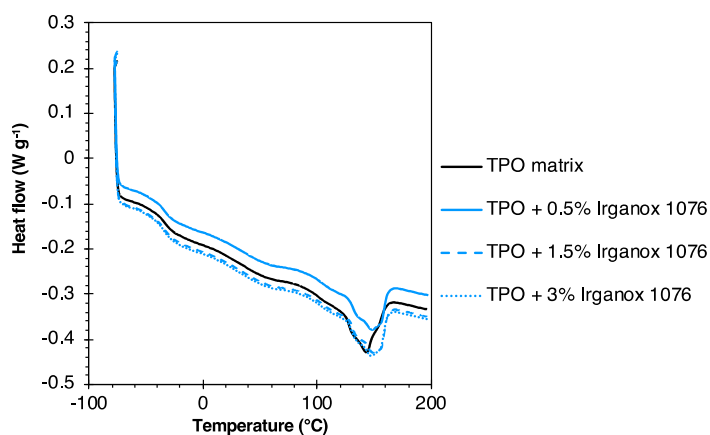

**Figure S6.** Evolution of DSC curves on the second heating of TPO formulations with different concentrations of Irganox 1076.

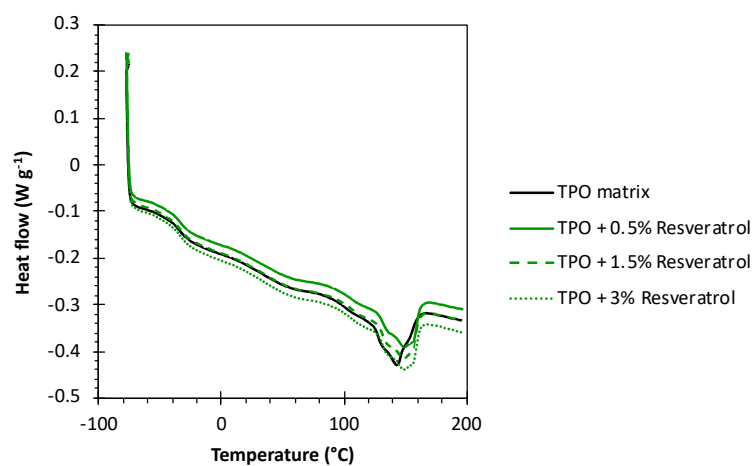

**Figure S7.** Evolution of DSC curves on the second heating of TPO formulations with different concentrations of resveratrol.

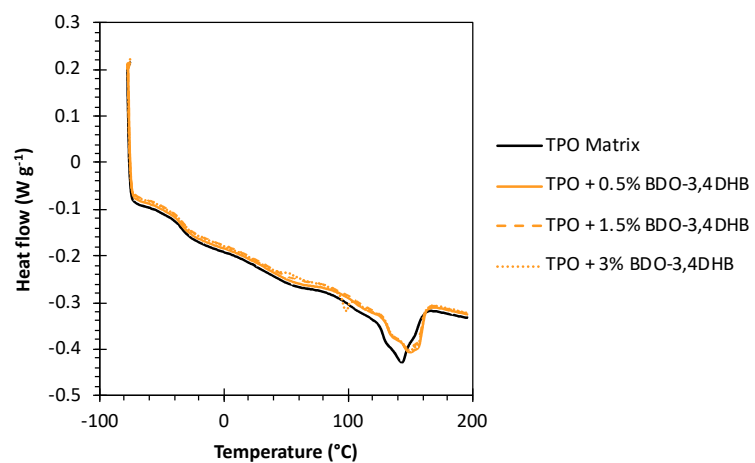

**Figure S8.** Evolution of DSC curves on the second heating of TPO formulations with different concentrations of BDO-3,4DHB.

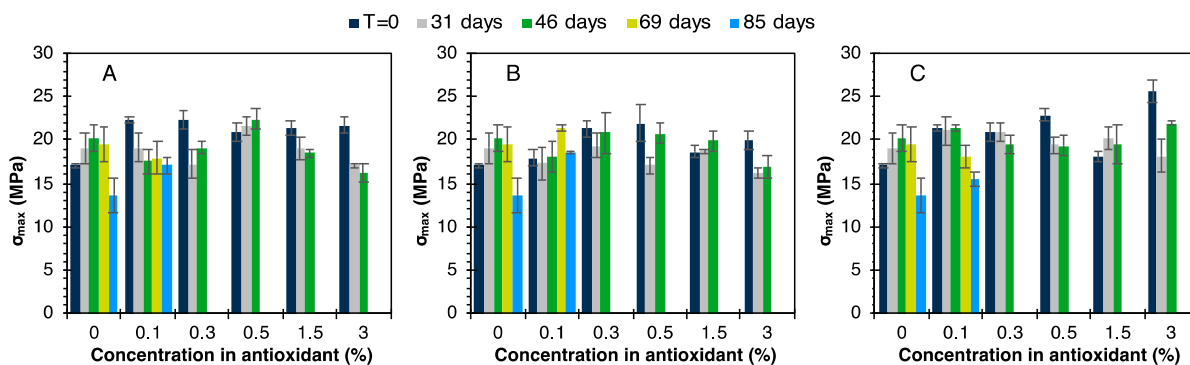

**Figure S9. Stress at break at different aging times of TPO formulations with (A) Irganox 1076; (B) resveratrol, (C) BDO-3,4DHB.**

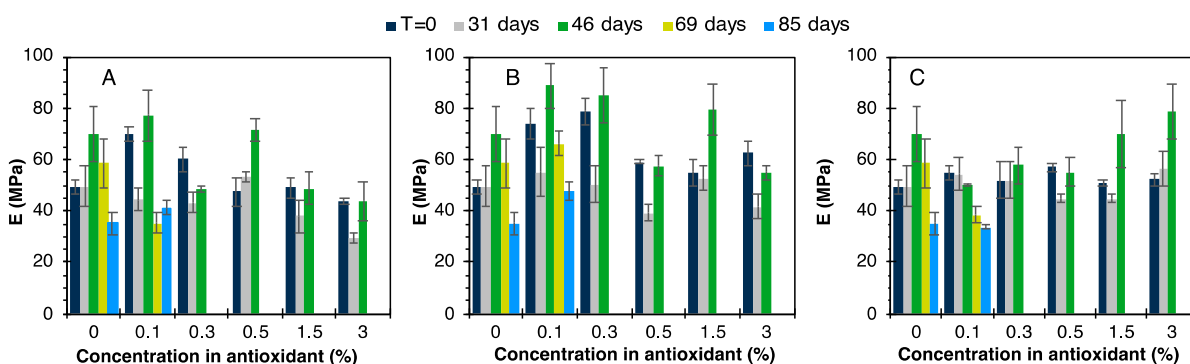

**Figure S10. Young Modulus at different aging times of TPO formulations with (A) Irganox 1076; (B) resveratrol, (C) BDO-3,4DHB.**

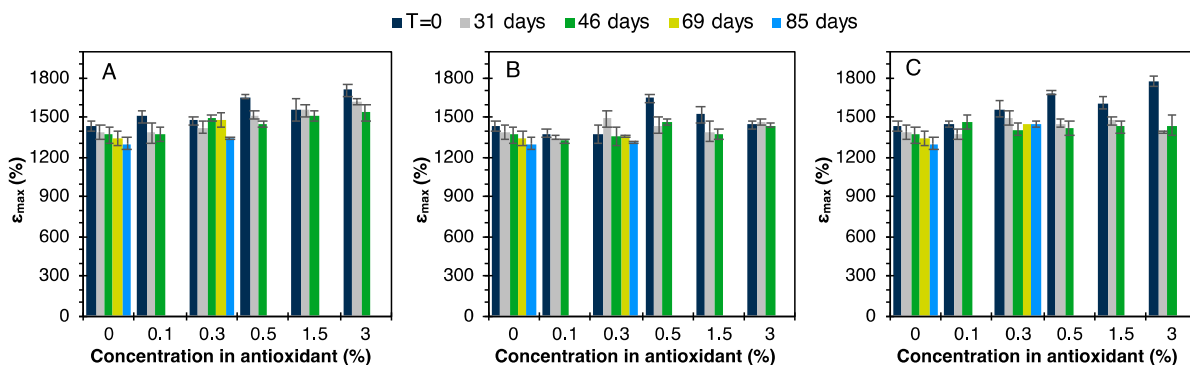

**Figure S11. Elongation at break, at different aging times of TPO formulations with (A) Irganox 1076; (B) resveratrol, (C) BDO-3,4DHB.**
